# Supplementary material for: Molecular Classification of Genes Associated with Hypoxic Lipid Metabolism in Pancreatic Cancer
Source: MDPI journal article supplement (doi:10.3390/biom12101533), 2022-10-21
Supplement: s1 [file s1]

Article

# Molecular Classification of Genes Associated with Hypoxic Lipid Metabolism in Pancreatic Cancer

## Supplementary

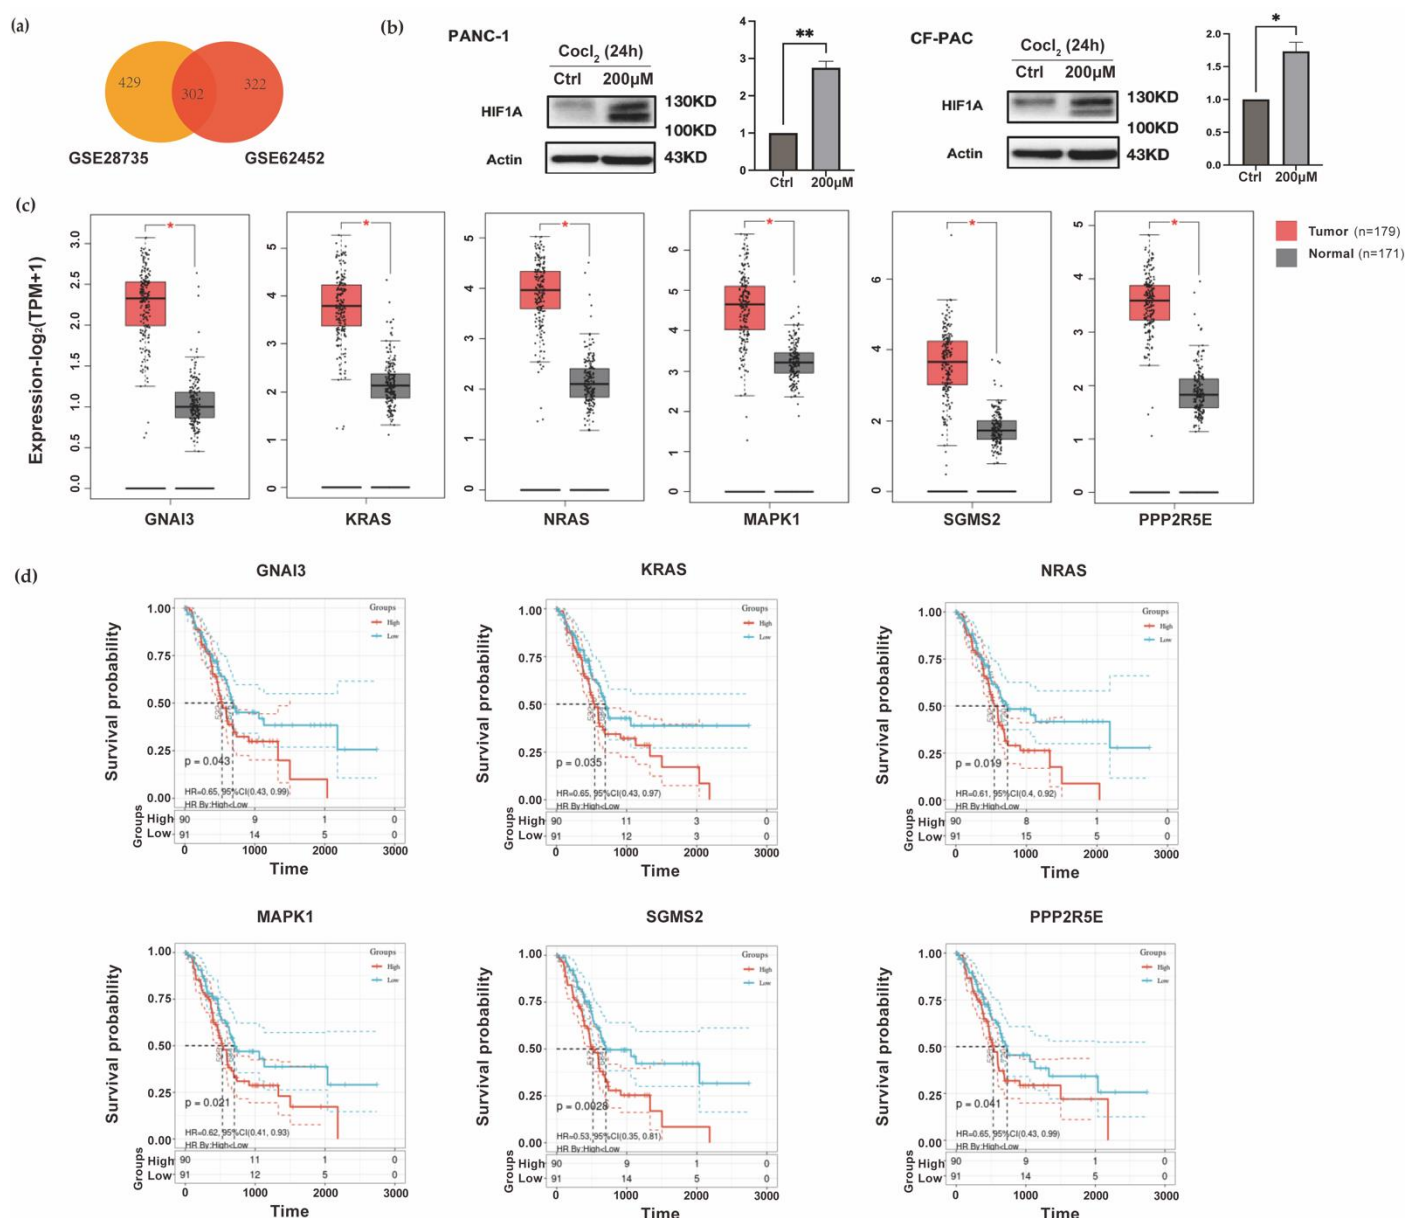

**Figure S1.** The hypoxia culture efficiency and supplement of data analysis in GEO and TCGA (a). Venn diagram with the number of genes analyzed in two GEO datasets (b). protein expression level of HIF-1 $\alpha$  and actin of PDAC cells before and after hypoxia treatment. (n=3, \*p<0.05, \*\*p<0.01) (cropped)(The origin blots are in additional file-origin blot.pdf) (c). The mRNA expression level of six genes in TCGA and GTEx database. (\*, p<0.05) (d).Kaplan-Meier survival analysis of six genes in Sphingolipid signaling pathway. (GSE28735:<https://www.ncbi.nlm.nih.gov/geo/query/acc.cgi?acc=gse28735>; GSE62452:<https://www.ncbi.nlm.nih.gov/geo/query/acc.cgi?acc=gse62452>; TCGA:<https://portal.gdc.cancer.gov/>) .

**Table S1.** The annotation of metabolites shown in the heatmap of metabolic analysis.

| Compound                                                                                                             | CFPAC-1<br>(Cocl2/Ctrl) | PANC-1<br>(Cocl2/Ctrl) |
|----------------------------------------------------------------------------------------------------------------------|-------------------------|------------------------|
| METLIN_1-Palmitoyllysophosphatidylcho-<br>line_MID_182                                                               | 3.308389596             | 0.007505441            |
| METLIN_1,2-Dioleoyl_PC_MID_45202                                                                                     | 359.5361017             | 1.12507489             |
| METLIN_Bis(2-<br>ethylhexyl)_phthalate_MID_263643                                                                    | 0.932044015             | 0.00927735             |
| VGDB_L-Isoleucine_YID_00990                                                                                          | 83.92849239             | 0.936690456            |
| VGDB_N-Tetracosanoyl-4-sphingenyl-1-O-phos-<br>phorylcholine_YID_05090                                               | 14.13277004             | 0.17089418             |
| VGDB_Alfa-Gln_YID_00582                                                                                              | 12.13238862             | 0.641294451            |
| METLIN_N-Lignoceroylsphingosine_MID_63015                                                                            | 16.98559759             | 0.932033054            |
| VGDB_2-Docosahexaenoyl-1-stearoyl-sn-glycero-<br>3-phosphoserine_YID_11877                                           | 16.4339009              | 0.92179356             |
| METLIN_Ceramide_(d18                                                                                                 | 13.94486939             | 0.807064334            |
| VGDB_1,2-Di-(13Z-docosenoyl)-sn-glycero-3-<br>phosphocholine_YID_11906                                               | 8.713625442             | 0.552735001            |
| VGDB_1-Stearoyl-2-arachidonoyl-sn-glycero-3-<br>phospho-(1'-myo-inositol)_YID_11903                                  | 13.10561572             | 0.843199098            |
| VGDB_2-Oleoyl-1-palmitoyl-sn-glycero-3-phos-<br>phoserine_YID_11820                                                  | 9.420347819             | 0.734978293            |
| MASSBANK_S-Lactoylglutathione; LC-ESI-<br>QTOF; MS2; CE                                                              | 7.351777976             | 0.668413173            |
| VGDB_Alfa-Gln_YID_00582                                                                                              | 6.255194808             | 0.573292073            |
| METLIN_1,2-dipalmitoyl-sn-glycero-3-<br>PC_MID_45182                                                                 | 9.886825432             | 0.994684981            |
| METLIN_Adenosine_MID_86                                                                                              | 3.972228694             | 0.435397105            |
| VGDB_2-Docosahexaenoyl-1-stearoyl-sn-glycero-<br>3-phosphoserine_YID_11877                                           | 6.072956626             | 0.79911369             |
| MASSBANK_4-Pyridoxic acid; LC-ESI-QTOF;<br>MS2; CE                                                                   | 1.116607564             | 0.158628687            |
| MASSBANK_Inosine; LC-ESI-QTOF; MS2; CE                                                                               | 4.128480306             | 0.658655122            |
| VGDB_2-Oleoyl-1-palmitoyl-sn-glycero-3-phos-<br>phocholine_YID_11817                                                 | 6.839477889             | 1.107740633            |
| VGDB_1-(1Z-Octadecenyl)-2-<br>(4Z,7Z,10Z,13Z,16Z,19Z-docosahexaenoyl)-sn-<br>glycero-3-phosphoethanolamine_YID_11841 | 5.138557482             | 0.847288021            |
| VGDB_1-Stearoyl-2-oleoyl-sn-glycero-3-phos-<br>phoethanolamine_YID_06907                                             | 5.775859113             | 1.007205874            |
| METLIN_Guanosine_MID_87                                                                                              | 3.307238737             | 0.580276964            |
| METLIN_N-Acetyl-D-glucosamine_MID_3356                                                                               | 4.603712003             | 0.815429767            |
| VGDB_2-Hydroxy-6-aminopurine_YID_07007                                                                               | 3.322255029             | 0.636154012            |
| MONA_Guanosine                                                                                                       | 3.392724156             | 0.671075439            |
| METLIN_N-Acetyl-alpha-D-glucosamine_1-phos-<br>phate_MID_384                                                         | 3.095448339             | 0.612486197            |
| VGDB_Palmitoyl_sphingomyelin_YID_11776                                                                               | 4.587027818             | 0.912091202            |
| VGDB_1,2-Dipalmitoyl-sn-glycero-3-phospho-(1'-<br>rac-glycerol)_YID_11804                                            | 4.93397648              | 1.043539389            |
| MONA_2-Thiocyridine                                                                                                  | 2.487400088             | 0.528617104            |
| METLIN_Hypoxanthine_MID_83                                                                                           | 3.676007321             | 0.794305414            |

|                                                                                         |             |             |
|-----------------------------------------------------------------------------------------|-------------|-------------|
| VGDB_1-Myristoyl-2-palmitoyl-sn-glycero-3-phosphocholine_YID_11779                      | 4.392732924 | 0.993469629 |
| MASSBANK_Glucoraphanin; LC-ESI-ITFT; MS2; HCD; CE 55.0 eV; [M-H]-                       | 14.3189005  | 3.331944338 |
| METLIN_PG(16                                                                            | 4.391713908 | 1.027627122 |
| METLIN_2',3'_cyclic_CMP_MID_62429                                                       | 1.28552611  | 0.31512276  |
| VGDB_1-Palmitoyl-3-oleoyl-sn-glycero-2-phosphoethanolamine_YID_11795                    | 4.106173075 | 1.013253197 |
| METLIN_Asp_Phe_Lys_MID_18300                                                            | 2.6214686   | 0.692160056 |
| METLIN_2'-Deoxyadenosine_MID_3382                                                       | 3.814154853 | 1.014706205 |
| MONA_Glucoraphanin                                                                      | 12.6772156  | 3.389517081 |
| METLIN_Vidarabine_MID_3020                                                              | 2.232487382 | 0.597916668 |
| METLIN_Inosine_MID_84                                                                   | 3.251564794 | 0.898834875 |
| METLIN_Sucrose_MID_137                                                                  | 3.77333273  | 1.056825935 |
| VGDB_1-Stearoyl-2-hydroxy-sn-glycero-3-phosphocholine_YID_11215                         | 4.476257849 | 1.275810366 |
| MASSBANK_(-)-Nicotine; LC-ESI-QTOF; MS2; CE                                             | 1.530242735 | 0.463777697 |
| MASSBANK_L-Glutamine; LC-ESI-QTOF; MS2; CE                                              | 1.098240469 | 0.341330244 |
| VGDB_1,2-Dilinoleoyl-sn-glycero-3-phosphocholine_YID_11846                              | 3.22818618  | 1.081407251 |
| VGDB_Robinin_YID_03141                                                                  | 5.817393173 | 1.97019593  |
| MASSBANK_Phosphocholine; LC-ESI-QTOF; MS2; CE                                           | 3.465504279 | 1.174264666 |
| MONA_Glucobrassicin                                                                     | 7.81094743  | 2.67497851  |
| VGDB_Indole_YID_01039                                                                   | 2.082931237 | 0.740080036 |
| METLIN_Allose_MID_348                                                                   | 2.28154659  | 0.814739294 |
| PLASMA_Sinapic acid                                                                     | 9.558403881 | 3.487892794 |
| VGDB_1-(9Z-Octadecenoyl)-sn-glycero-3-phosphocholine_YID_06098                          | 2.604411118 | 0.986608817 |
| MASSBANK_Kaempferol-3-O-beta-D-galactoside-7-O-alpha-L-rhamnoside; LC-ESI-QTOF; MS2; CE | 3.6541576   | 1.438388049 |
| MASSBANK_Sinapoyl malate; LC-ESI-QTOF; MS2; CE                                          | 8.893679188 | 3.531844778 |
| VGDB_Triethanolamine_YID_02409                                                          | 1.441865983 | 0.580350155 |
| MASSBANK_Sarcinaxanthin monoglucoside; FAB-EBEB; MS2; m/z                               | 3.033087245 | 1.244347844 |
| VGDB_Arg-Asp_YID_05974                                                                  | 1.470869371 | 0.604665579 |
| MASSBANK_Kaempferol-7-O-alpha-L-rhamnoside; LC-ESI-QTOF; MS2; CE                        | 3.365975476 | 1.39004996  |
| METLIN_Leucinic_acid_MID_64935                                                          | 0.905883776 | 0.377003003 |
| VGDB_1-Palmitoyl-2-linoleoyl-sn-glycero-3-phosphocholine_YID_11815                      | 2.703556759 | 1.151767419 |
| VGDB_1-Octadecanoyl-sn-glycero-3-phosphoethanolamine_YID_06906                          | 2.299019227 | 1.021576982 |
| METLIN_Glycerophosphocholine_MID_370                                                    | 0.987341233 | 0.459132217 |
| VGDB_(-)-Riboflavin_YID_00817                                                           | 1.677301164 | 0.809955805 |
| METLIN_PS(16                                                                            | 1.588192507 | 0.77472941  |
| METLIN_gamma-Glu-Cys_MID_3379                                                           | 1.884642878 | 0.942906523 |

|                                                                                                                                                   |             |             |
|---------------------------------------------------------------------------------------------------------------------------------------------------|-------------|-------------|
| VGDB_1-Stearoyl-2-docosaehaenoyl-sn-glycero-3-phosphocholine_YID_11872                                                                            | 3.16636831  | 1.606799167 |
| VGDB_2'-Hydroxy-3-methoxychalcone_YID_08452                                                                                                       | 1.606346514 | 0.841957659 |
| METLIN_(3R,5R)-3,5-Dihydroxy-7-[(1S,2S,8S,8aR)-2-methyl-8-[(2-methylbutanoyl)oxy]-1,2,6,7,8,8a-hexahydro-1-naphthalenyl]heptanoic_acid_MID_985303 | 1.57995774  | 0.84776153  |
| METLIN_PE(16                                                                                                                                      | 2.350514846 | 1.281098658 |
| METLIN_Gamma-Glu-Leu_MID_23750                                                                                                                    | 2.410776875 | 1.329079709 |
| MASSBANK_Dicamba; LC-ESI-ITFT; MS2; CE                                                                                                            | 1.848558605 | 1.042206614 |
| MASSBANK_Dehydro fucoxanthin acetate; FAB-EBEB; MS2; m/z                                                                                          | 0.946592484 | 0.547950623 |
| METLIN_Tyr_Glu_Gln_MID_22048                                                                                                                      | 0.763663967 | 0.447365245 |
| METLIN_Creatine_phosphate_MID_326                                                                                                                 | 1.311322577 | 0.785516671 |
| VGDB_gamma.-Glu-Cys_YID_01201                                                                                                                     | 1.707839467 | 1.051813492 |
| Trimethylamine??N-oxide                                                                                                                           | 1.206302774 | 0.74349403  |
| METLIN_Cys_Ser_Gln_MID_21459                                                                                                                      | 4.661339684 | 2.890899502 |
| MASSBANK_GABA; LC-ESI-QTOF; MS2; CE                                                                                                               | 1.559360927 | 0.976447322 |
| METLIN_L-a-Lysophosphatidylserine_MID_34531                                                                                                       | 1.809279866 | 1.150209731 |
| METLIN_Hypotaurine_MID_281                                                                                                                        | 1.221682676 | 0.819425906 |
| METLIN_L-a-Lysophosphatidylserine_MID_34531                                                                                                       | 1.510851219 | 1.016015721 |
| MASSBANK_1-O-beta-D-Glucopyranosyl sinapate; LC-ESI-QTOF; MS2; CE                                                                                 | 2.355356821 | 1.585199671 |
| VGDB_Threonic_acid_YID_11538                                                                                                                      | 1.411715433 | 0.993854439 |
| RESPECT_Choline                                                                                                                                   | 1.124415195 | 0.791955445 |
| MASSBANK_Imidacloprid; LC-ESI-ITFT; MS2; CE                                                                                                       | 1.420583967 | 1.019042056 |
| METLIN_Glycerophosphocholine_MID_370                                                                                                              | 1.370292282 | 0.993967115 |
| METLIN_Thiamine_MID_229                                                                                                                           | 1.047481233 | 0.766076383 |
| METLIN_L-Tyrosine_MID_34                                                                                                                          | 0.950501471 | 0.708338786 |
| METLIN_PS(18                                                                                                                                      | 1.370405073 | 1.024152746 |
| MASSBANK_4-Methyl-5-thiazoleethanol; LC-ESI-QTOF; MS2; CE                                                                                         | 1.174107247 | 0.891207306 |
| VGDB_Cytosine_YID_00961                                                                                                                           | 1.62611736  | 1.237113917 |
| VGDB_Anthranilic_acid_YID_00646                                                                                                                   | 1.140193792 | 0.935121478 |
| VGDB_N-Acetylglucosaminylasparagine_YID_02059                                                                                                     | 1.055947981 | 0.879469937 |
| METLIN_N-nonanoyl-L-Homoserine_lactone_MID_45725                                                                                                  | 0.941495199 | 0.789501011 |
| VGDB_bata-Hydroxypyruvic_acid_YID_00724                                                                                                           | 0.659617637 | 0.553964634 |
| MONA_Malic acid                                                                                                                                   | 1.571352765 | 1.354224414 |
| MASSBANK_L-(+)-Lysine; LC-ESI-QTOF; MS2; CE                                                                                                       | 0.998671604 | 0.86310566  |
| MASSBANK_C10-LAS (TENTATIVE)                                                                                                                      | 1.37761675  | 1.196172473 |
| MASSBANK_Tryptophan; LC-ESI-ITFT; MS2; HCD; CE 90.0 eV; [M-H]-                                                                                    | 0.958800503 | 0.837999872 |
| METLIN_Xanthosine_MID_3408                                                                                                                        | 1.618244312 | 1.43062595  |
| RESPECT_5-AMINOVALERIC ACID                                                                                                                       | 0.954678549 | 0.844339583 |

|                                                                        |             |             |
|------------------------------------------------------------------------|-------------|-------------|
| METLIN_Norethindrone_acetate_MID_44171                                 | 1.123186441 | 1.000423242 |
| METLIN_Cystathionine_MID_63300                                         | 0.930820836 | 0.829832758 |
| METLIN_D-Aspartic_acid_MID_63097                                       | 0.910156615 | 0.813465187 |
| VGDB_Glycerophosphocholine_YID_01203                                   | 1.184078258 | 1.06217822  |
| METLIN_Asn_Leu_Lys_MID_16424                                           | 0.822282657 | 0.738845957 |
| METLIN_D-Erythrose_4-phosphate_MID_355                                 | 1.065082635 | 0.974279306 |
| VGDB_1-Palmitoyl-2-hydroxy-sn-glycero-3-phosphoethanolamine_YID_11013  | 1.527709609 | 1.398667687 |
| VGDB_Nicotinic_acid_adenine_dinucleotide_YID_11745                     | 0.874621567 | 0.806254573 |
| MONA_Asparagine                                                        | 1.723145449 | 1.602722989 |
| MONA_Dimethyl sulfoxide                                                | 1.549998782 | 1.454429539 |
| VGDB_3-Methyl-L-histidine_YID_01435                                    | 0.879046551 | 0.827090583 |
| METLIN_ADMA_MID_6891                                                   | 1.103257918 | 1.04149395  |
| MASSBANK_Cytidine 5'-diphosphocholine; LC-ESI-QTOF; MS2; CE            | 0.785581655 | 0.744231569 |
| METLIN_PE(18                                                           | 1.330648938 | 1.266440017 |
| MASSBANK_Xanthosine; LC-ESI-QTOF; MS2; CE                              | 1.593936595 | 1.552910998 |
| VGDB_beta.-Nicotinamide_adenine_dinucleotide_YID_00003                 | 1.049633442 | 1.043550762 |
| METLIN_5-L-Glutamyl-L-alanine_MID_58376                                | 1.436071778 | 1.436872648 |
| RESPECT_3-Hydroxy-3-Methylglutaric acid                                | 0.865893825 | 0.868067898 |
| METLIN_L-Glutamic_acid_MID_19                                          | 0.938256384 | 0.962093798 |
| METLIN_Citric_acid_MID_124                                             | 0.970821386 | 0.996641282 |
| METLIN_Pyridoxine_MID_2202                                             | 0.8354293   | 0.858488899 |
| METLIN_N-Methylantranilic_acid_MID_44613                               | 0.824324906 | 0.84757245  |
| MONA_Ornithine                                                         | 0.997139132 | 1.025933462 |
| VGDB_Cyclic_adenosine_diphosphate_ribose_YID_03552                     | 1.051987312 | 1.083157939 |
| METLIN_4-Nitrophenol_MID_4100                                          | 0.955531738 | 0.987576009 |
| MASSBANK_Phthalic anhydride; LC-ESI-QTOF; MS2; [M+H] <sup>+</sup> ; CE | 1.247796308 | 1.290595143 |
| MASSBANK_Adiphenine; LC-ESI-QTOF; MS2; CE                              | 0.890037486 | 0.922276234 |
| MASSBANK_Acetylcholine; LC-ESI-QTOF; MS2; CE                           | 0.947984353 | 0.982712258 |
| METLIN_L-Serine_MID_30                                                 | 0.929171241 | 0.964372951 |
| METLIN_Pro_Asp_MID_23776                                               | 0.969551948 | 1.010000567 |
| MASSBANK_beta-Nicotinamide adenine dinucleotide; LC-ESI-QTOF; MS2; CE  | 0.977610767 | 1.022794298 |
| MASSBANK_Citrulline; LC-ESI-QTOF; MS2; CE                              | 0.933478193 | 0.984350745 |
| MASSBANK_Niacinamide; LC-ESI-QTOF; MS2; CE                             | 0.615502233 | 0.652636752 |
| VGDB_Acetyl-DL-carnitine_YID_07777                                     | 0.863263728 | 0.916160807 |
| MASSBANK_4-Hydroxybenzoylcholine; LC-ESI-QTOF; MS2; CE                 | 0.860424734 | 0.914976857 |
| MONA_Leucine                                                           | 0.837896191 | 0.89175146  |
| METLIN_Ile_Pro_Lys_MID_16048                                           | 1.026595871 | 1.102409944 |
| VGDB_Galactonic_acid_YID_07692                                         | 0.558404993 | 0.599785228 |
| VGDB_L-Methionine_YID_00595                                            | 0.879476057 | 0.946433752 |
| METLIN_cis-Aconitic_acid_MID_3300                                      | 0.944837166 | 1.018172496 |

|                                                              |             |             |
|--------------------------------------------------------------|-------------|-------------|
| METLIN_Choline_MID_56                                        | 0.904820999 | 0.975628747 |
| METLIN_3-Carboxypropyl_trimethylammo-<br>nium_MID_34501      | 0.861809453 | 0.932878963 |
| MONA_Tryptophan                                              | 0.887765951 | 0.969340194 |
| VGDB_3,4,5-Trimethacarb_YID_07620                            | 1.289564907 | 1.410661725 |
| METLIN_DL-Phenylalanine_MID_65707                            | 0.821547361 | 0.904328376 |
| METLIN_L-Serine_MID_30                                       | 0.993733484 | 1.095055483 |
| METLIN_D-(+)-Mannose_MID_136                                 | 1.159650815 | 1.279518846 |
| METLIN_L-Phenylalanine_MID_28                                | 0.924562364 | 1.024414656 |
| VGDB_Betaine_YID_01224                                       | 0.890464341 | 0.991756971 |
| VGDB_N-.alpha.-Acetyl-L-ornithine_YID_01020                  | 0.876148757 | 0.977256386 |
| METLIN_D-Pipecolic_acid_MID_58337                            | 0.910227555 | 1.017625077 |
| METLIN_D-Proline_MID_58150                                   | 0.798155247 | 0.89555686  |
| VGDB_4-Hydroxyisophthalic_acid_YID_04460                     | 0.846430125 | 0.965929306 |
| MONA_Allantoin                                               | 0.808625877 | 0.922801253 |
| MASSBANK_Glycerol-2-phosphate; LC-ESI-<br>QTOF; MS2; CE      | 0.966732703 | 1.109725616 |
| MASSBANK_Glutamic acid; LC-ESI-QTOF; MS2;<br>CE              | 0.761286798 | 0.874146505 |
| METLIN_L-Proline_MID_29                                      | 0.837358028 | 0.962139082 |
| MASSBANK_L-Citrulline; LC-ESI-ITFT; MS2; m/z                 | 0.821481197 | 0.962703851 |
| VGDB_D-Aspartic_acid_YID_00987                               | 0.714360485 | 0.840222231 |
| METLIN_2-Pyrimidine_Acetic_Acid_MID_45029                    | 0.860390785 | 1.013850099 |
| METLIN_1-Aminocyclopropane-1-carbox-<br>ylic_acid_MID_6029   | 0.787614691 | 0.935440793 |
| MASSBANK_L-5-Oxoproline; LC-ESI-QTOF;<br>MS2; CE             | 0.750906376 | 0.901167819 |
| METLIN_5'-CMP/_Cytidine-5-monophos-<br>phate_MID_3452        | 0.756604812 | 0.908971358 |
| VGDB_L-Threonine_YID_00748                                   | 0.695360007 | 0.849223485 |
| METLIN_D-Glutamine_MID_63630                                 | 0.854365373 | 1.050816078 |
| VGDB_N-Fluorenylacetamide_YID_01872                          | 0.837121498 | 1.030292429 |
| MASSBANK_N-Acetyl-DL-aspartic acid; LC-ESI-<br>QTOF; MS2; CE | 0.896876274 | 1.124861834 |
| RESPECT_N-Acetylneuraminate                                  | 0.986229576 | 1.239061314 |
| METLIN_CMP-N-acetylneu-<br>raminic_acid_MID_434              | 0.853774357 | 1.078788083 |
| RESPECT_Pantothenate                                         | 0.842207443 | 1.071959947 |
| VGDB_L-Norvaline_YID_01642                                   | 0.910264617 | 1.171153325 |
| VGDB_1-(1',3'-Benzodioxol-5'-yl)-2-bu-<br>tanamine_YID_07636 | 1.225617209 | 1.578178136 |
| RESPECT_Pantothenate                                         | 0.821875467 | 1.059113282 |
| METLIN_N-Acetyl-L-alanine_MID_5733                           | 0.737603376 | 0.95258507  |
| VGDB_Creatine_YID_00862                                      | 0.810436352 | 1.053234101 |
| MONA_Abietic acid                                            | 0.512564861 | 0.666680777 |
| MONA_N-Acetylneuraminic acid                                 | 0.951276727 | 1.247249185 |
| MASSBANK_7,8-Didehydroastaxanthin; FAB-<br>EBEB; MS2; m/z    | 0.661215242 | 0.869443374 |
| RESPECT_S-Adenosyl-L-methionine                              | 0.386505242 | 0.513894962 |
| MONA_3-Hydroxyphenylalanine                                  | 0.844369946 | 1.129390861 |
| METLIN_Trigonellinamide_MID_274                              | 0.784813407 | 1.074917217 |

|                                                                                                                           |             |             |
|---------------------------------------------------------------------------------------------------------------------------|-------------|-------------|
| METLIN_GSH/_ Glutathione_MID_44                                                                                           | 0.875627901 | 1.234249343 |
| MASSBANK_C12-AS (TENTATIVE)                                                                                               | 1.076645557 | 1.517782361 |
| METLIN_Vinpocetine_MID_44335                                                                                              | 0.697025095 | 0.988114348 |
| METLIN_Phosphocholine_MID_3318                                                                                            | 0.74477878  | 1.070484207 |
| MONA_Glutathione (reduced)                                                                                                | 0.700717273 | 1.014541084 |
| METLIN_Quadrangolin_A;_2-[(1S,2S,4aR,8aS)-1-Hydroxy-4a-methyl-8-methylenedecahydro-2-naphthalenyl]acrylic_acid_MID_985308 | 0.897192879 | 1.303363558 |
| METLIN_NADH_MID_3687                                                                                                      | 0.968746653 | 1.407726128 |
| METLIN_C75_MID_44901                                                                                                      | 0.79314397  | 1.162645765 |
| METLIN_Succinic_acid_MID_114                                                                                              | 0.706768634 | 1.036175734 |
| METLIN_DL-2-Aminoadipic_acid_MID_324                                                                                      | 0.89521736  | 1.333610407 |
| METLIN_D-Sorbitol_MID_143                                                                                                 | 0.59916624  | 0.9040978   |
| MONA_N-Methylserine                                                                                                       | 0.700470269 | 1.063166814 |
| VGDB_Indole-7-carboxaldehyde_YID_11618                                                                                    | 0.748358307 | 1.148165821 |
| VGDB_1-Oleoyl-2-hydroxy-sn-glycero-3-phospho-(1'-rac-glycerol)_YID_11182                                                  | 0.865404942 | 1.334767205 |
| MONA_Proline-hydroxyproline                                                                                               | 0.756607263 | 1.181040054 |
| MONA_4-Acetamidobutyric acid                                                                                              | 0.678938397 | 1.060725527 |
| MONA_Uridine-5-diphosphoacetylgalactosamine                                                                               | 0.680081364 | 1.066213634 |
| VGDB_L-Carnosine_YID_00969                                                                                                | 0.480360721 | 0.755944885 |
| METLIN_2-Methylbutyroylcarnitine_MID_5367                                                                                 | 0.793775179 | 1.253126909 |
| METLIN_Myo-Inositol_MID_144                                                                                               | 0.709902403 | 1.131500832 |
| VGDB_(1R,5S)-8-Methyl-8-azabicyclo[3.2.1]octan-3-amine_YID_02035                                                          | 0.518872626 | 0.828924064 |
| METLIN_N-Acetylaspartate_MID_3769                                                                                         | 0.702706109 | 1.126411749 |
| VGDB_L-Propionylcarnitine_YID_07992                                                                                       | 0.807486807 | 1.299397334 |
| METLIN_D-Arabinono-1,4-lactone_MID_3272                                                                                   | 0.723405261 | 1.202902846 |
| METLIN_L-Glutamine_MID_18                                                                                                 | 0.786243449 | 1.328316767 |
| METLIN_Uridine_diphosphate-N-acetylglucosamine_MID_41549                                                                  | 0.555753181 | 0.941081169 |
| VGDB_Pyridoxine_YID_00873                                                                                                 | 0.586237819 | 0.99501286  |
| VGDB_N-Glycolylneuraminic_acid_YID_01958                                                                                  | 0.800204064 | 1.378275428 |
| METLIN_UDPG/_ Uridine_5'-diphosphoglucose_MID_3598                                                                        | 0.529464096 | 0.916534355 |
| METLIN_Ergothioneine_MID_53                                                                                               | 0.508678063 | 0.884856277 |
| METLIN_N1,N12-Diacetylspermine_MID_6525                                                                                   | 0.567119367 | 1.013502728 |
| MONA_Phthalic acid                                                                                                        | 0.900790926 | 1.633420021 |
| METLIN_Á-D-Glucose_MID_133                                                                                                | 0.502174816 | 0.911518823 |
| METLIN_L-NMMA_MID_44311                                                                                                   | 0.680834976 | 1.241076868 |
| METLIN_4-Hydroxybenzoic_acid_MID_3263                                                                                     | 0.781713959 | 1.429113216 |
| METLIN_5'-AMP/_ Adenosine_5'-monophosphate_MID_34478                                                                      | 0.488055944 | 0.917845823 |
| VGDB_Creatine_phosphate_YID_01758                                                                                         | 0.515880693 | 0.982563214 |
| VGDB_D-Pyroglutamic_acid_YID_01742                                                                                        | 0.739634326 | 1.411538774 |
| METLIN_Aceclidine_MID_44245                                                                                               | 0.898067109 | 1.718190089 |
| METLIN_dGMP/_ 2'-Deoxyguanosine_5'-monophosphate_MID_3489                                                                 | 0.477356265 | 0.9148082   |
| VGDB_3-Furancarboxylic_acid,_tetrahydro-4-methylene-5-oxo-2-propyl-,_(2R,3S)-rel-_YID_07481                               | 0.416102726 | 0.836608    |

|                                                                        |             |             |
|------------------------------------------------------------------------|-------------|-------------|
| METLIN_(;Å)-Propionylcarnitine_MID_85176                               | 0.632943069 | 1.273776729 |
| VGDB_Dulcitol_YID_01588                                                | 0.479617645 | 0.96862346  |
| METLIN_O-Acetyl-L-serine_MID_3270                                      | 0.427058886 | 0.865459742 |
| METLIN_Ala_His_MID_23724                                               | 0.510924404 | 1.036545664 |
| METLIN_L-Carnitine_MID_52                                              | 0.469701339 | 0.953597352 |
| VGDB_3-Deoxy-D-glycero-D-galacto-2-nonulosonic_acid_YID_08686          | 0.705320693 | 1.433473831 |
| METLIN_Pro_Thr_Gln_MID_18145                                           | 0.684643284 | 1.398274895 |
| METLIN_Uric_acid_MID_88                                                | 0.487707722 | 1.034840926 |
| METLIN_Thr_Met_Lys_MID_17412                                           | 0.714665246 | 1.530497713 |
| METLIN_(;Å)-Hexanoylcarnitine_MID_85174                                | 0.482261981 | 1.037217903 |
| METLIN_Butanoyl_PAF_MID_62940                                          | 0.528166803 | 1.14109501  |
| METLIN_Gln_Leu_Lys_MID_23514                                           | 0.570374686 | 1.269673385 |
| METLIN_L-Histidine_MID_21                                              | 0.152502761 | 0.348169163 |
| METLIN_D-Glyceraldehyde_3-phosphate_MID_3294                           | 0.473760675 | 1.083787506 |
| VGDB_N-Acetyl-L-glutamic_acid_YID_01168                                | 0.37446681  | 0.859631807 |
| METLIN_N1-Acetylspemidine_MID_3323                                     | 0.438492899 | 1.032329745 |
| VGDB_Tetraethylene_glycol_YID_07655                                    | 0.76746324  | 1.81031481  |
| MONA_Cyclohexanamine                                                   | 0.432030009 | 1.053338062 |
| MASSBANK_Arginine; LC-ESI-ITFT; MS2; CE<br>80.0 eV; [M+H] <sup>+</sup> | 0.372151295 | 0.921921308 |
| VGDB_Sarsasapogenin_YID_02025                                          | 0.485837012 | 1.239520524 |
| METLIN_Hypotaurine_MID_281                                             | 0.388709871 | 1.016579892 |
| METLIN_Creatine_MID_7                                                  | 0.375257732 | 1.002344521 |
| METLIN_Sphinganine_MID_395                                             | 0.703795877 | 1.931228673 |
| METLIN_N-Acetyl-L-glutamic_acid_MID_3325                               | 0.333476649 | 0.922103376 |
| VGDB_Erucamide_YID_04971                                               | 0.767299921 | 2.12322626  |
| METLIN_Taurine_MID_31                                                  | 0.301257765 | 0.860529948 |
| METLIN_N-Acetylputrescine_MID_3252                                     | 0.914762359 | 2.652448062 |
| MONA_Histidine                                                         | 0.080044455 | 0.235067732 |
| METLIN_5'-Methylthioadenosine_MID_3425                                 | 0.288281316 | 0.908460698 |
| METLIN_N-Lactoyl-phenylalanine_MID_263655                              | 0.329087834 | 1.112814229 |
| MASSBANK_L-Histidine; LC-ESI-QTOF; MS2;<br>CE                          | 0.107256441 | 0.405758354 |
| MASSBANK_L-(+)-Arginine; LC-ESI-QTOF; MS2;<br>CE                       | 0.28634095  | 1.086014328 |
| VGDB_(R)-Butyrylcarnitine_YID_01888                                    | 0.315180744 | 1.351263132 |
| VGDB_Spermidine_YID_00875                                              | 0.299278858 | 1.73012013  |
| METLIN_Asp_Gln_Gly_MID_17811                                           | 0.476694722 | 4.171812588 |
| METLIN_p-Tolyl_Sulfate_MID_263577                                      | 0.347986334 | 3.329659682 |
| VGDB_(4-Aminobutyl)guanidine_YID_00732                                 | 0.492603996 | 5.312321641 |
| VGDB_1-Methyl-L-histidine_YID_01434                                    | 0.158845992 | 2.079675252 |
| METLIN_GSH/_Glutathione_MID_44                                         | 0.147669944 | 1.938982085 |
| VGDB_Pheophorbide_a_YID_03998                                          | 0.341278342 | 5.103853851 |
| METLIN_Thioetheramide-PC_MID_63018                                     | 0.064297886 | 1.298216625 |
| VGDB_Mono-2-ethylhexyl_phthalate_YID_01948                             | 0.006396515 | 1.284909057 |

**Table S2.** Primer sequences for RT-qPCR in the research.

| Gene  | Species | Sequence(5'-3')                |
|-------|---------|--------------------------------|
| MAPK1 | human   | F 5'-TACACCAACCTCTCGTACATCG-3' |



|                |       |                                 |
|----------------|-------|---------------------------------|
|                |       | R 5'-CATGTCTGAAGCGCAGTAAGATT-3' |
| SGMS2          | human | F 5'-CAAATTGCTATGCCCACTGAATC-3' |
|                |       | R 5'-GTTGTCAAGACGAGGTTGAAAAC-3  |
| GNAI3          | human | F 5'-AGCAATAGACGGTGCCTCAG-3'    |
|                |       | R 5'-TGCGGTCGATCATCTTGCTT-3'    |
| PPP2R5E        | human | F 5'-TAGGTCTCAAGGCAAGCCTAT-3'   |
|                |       | R 5'-CTGTCAAACAGCCTCTGCTTATT-3' |
| $\beta$ -actin | human | F 5'-GGTCATCACTATTGGCAACG-3'    |
|                |       | R 5'-ACGGATGTCAACGTCACACT-3'    |

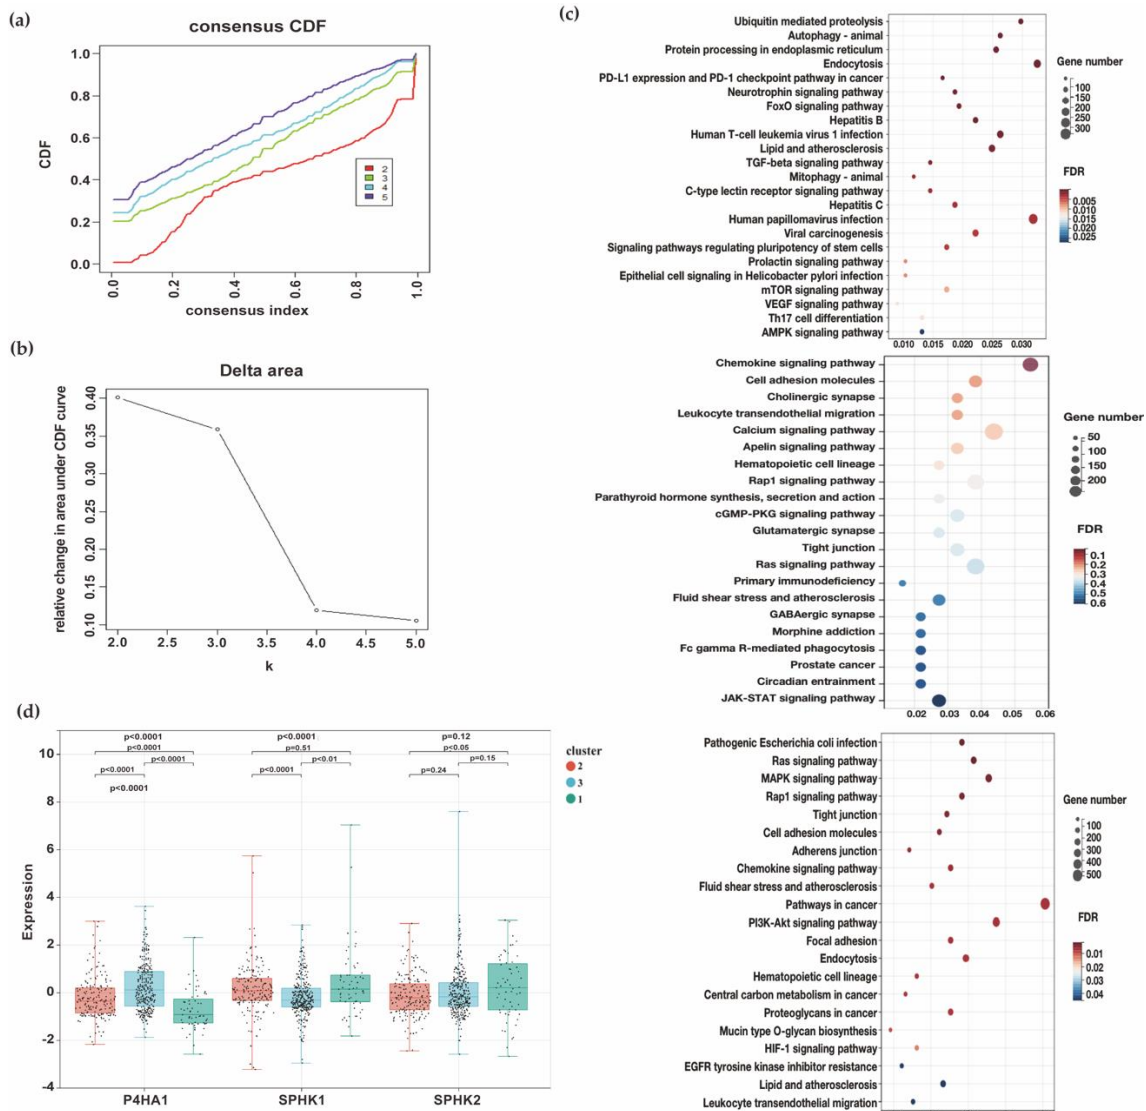

**Figure S2.** Extra information of PDAC subtypes (a). CDF curve of the merged dataset. (b). CDF delta area curve. (c). Functional enrichment analysis results for three subtypes. (d). Expression box plot of targeting genes in samples. (cluster1=59, cluster2=183, cluster3=321). (CDF: cumulative distribution function).

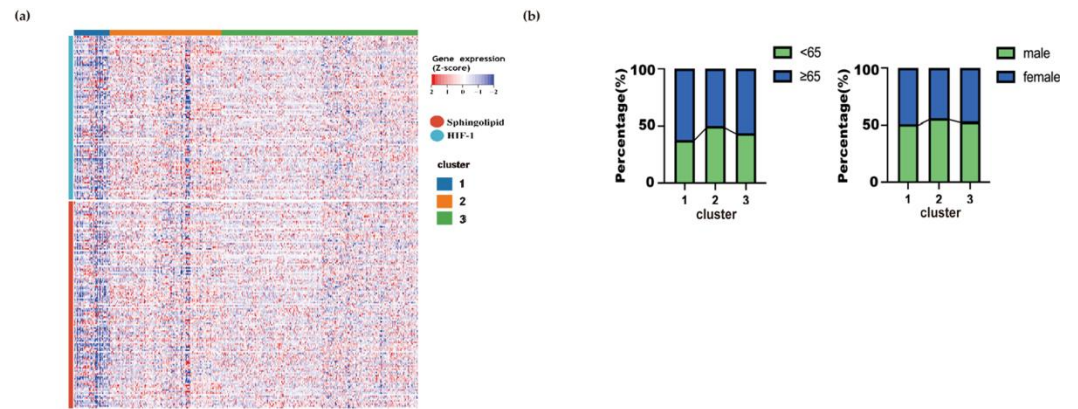

**Figure S3.** Distribution characters of clusters (cluster1=59,cluster2=183,cluster3=321) (a). The expression heatmap of cluster groups in hypoxia and sphingolipid metabolism pathways. (b).The distribution of clinical information about age and sex.
